# Supplementary material for: Intratumor childhood vaccine-specific CD4+ T-cell recall coordinates antitumor CD8+ T cells and eosinophils
Source: HighWire-hosted journal article supplement (doi:10.1136/jitc-2022-006463), 2023-04-01
Supplement: jitc-2022-006463supp001_data_supplement.pdf [file jitc-2022-006463supp001_data_supplement.pdf]

## **SUPPLEMENTARY INFORMATION**

### **Intratumoral Childhood Vaccine-Specific CD4<sup>+</sup> T cell Recall**

#### **Coordinates Antitumor CD8<sup>+</sup> T cells and Eosinophils**

Brown, MC et al., 2023

**This file contains:**

**Supplementary Figures 1-13**

**Supplementary Table 1**

**Supplementary methods**

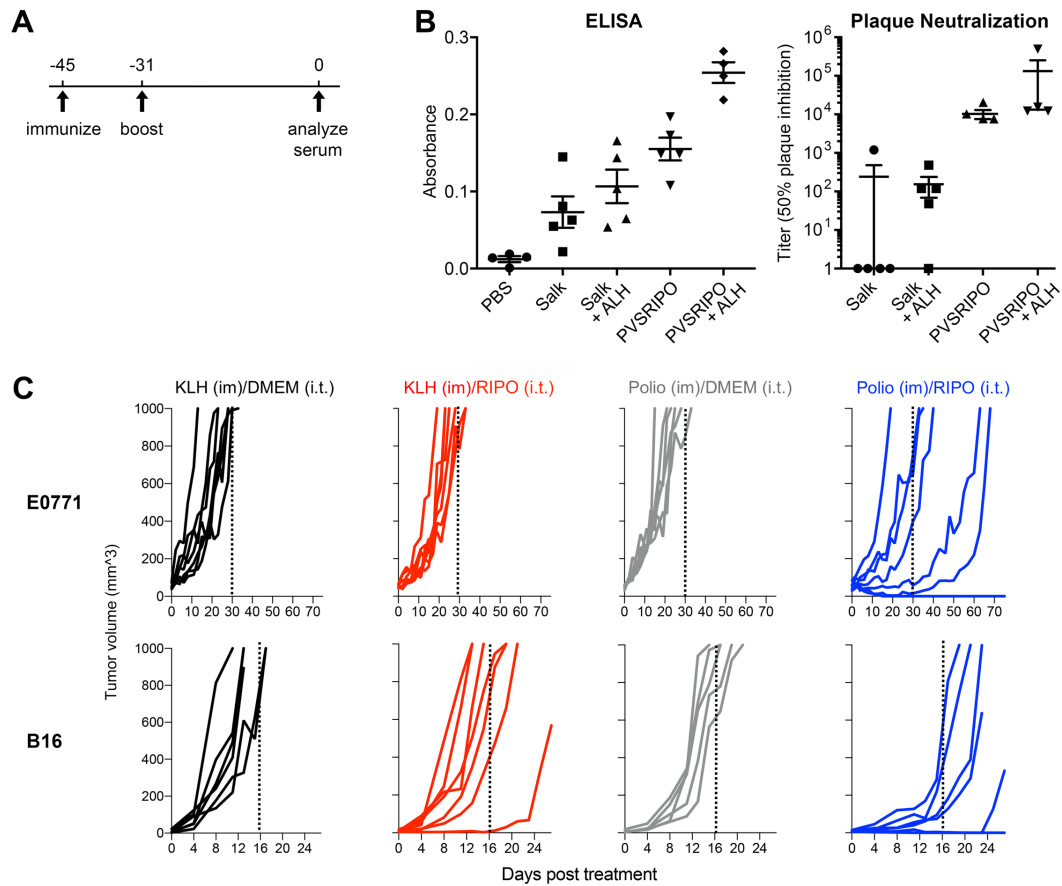

**Supplementary Figure 1.** (A) Schema for immunization validation in (B). (B) ELISA (left) and plaque neutralization assay (right) from serum of mice immunized as shown ( $n=5$ /group). (C) Individual tumor volumes from experiments shown in Figure 1B.

**A**

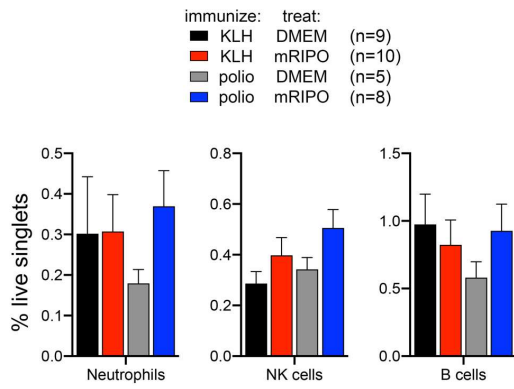

**B**

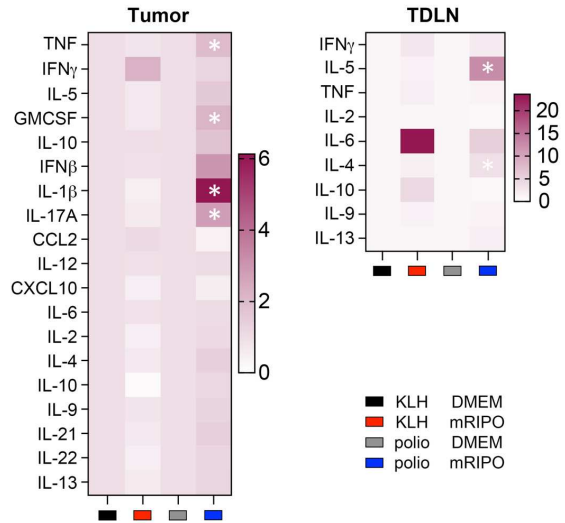

**C**

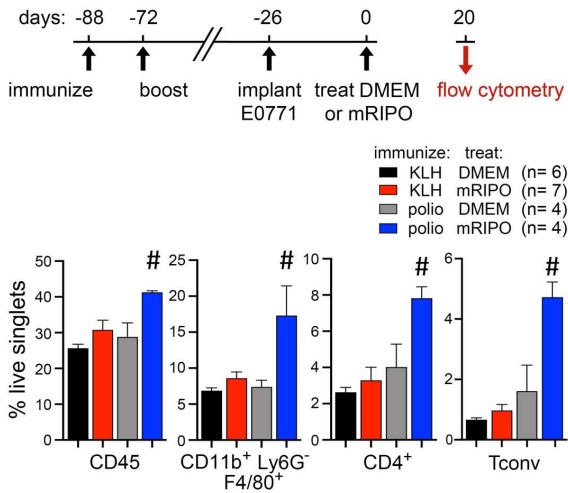

**D**

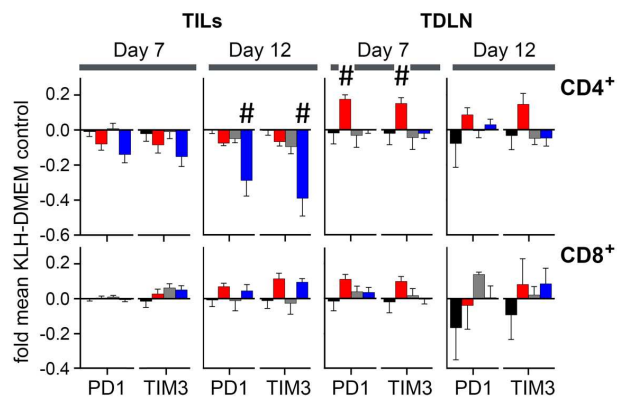

**E**

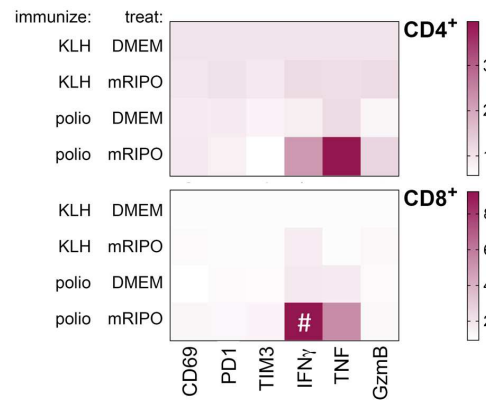

**F**

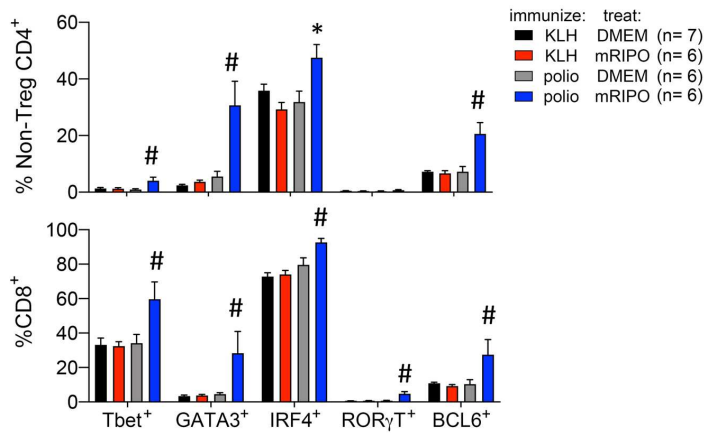

**Supplementary Figure 2.** (A) Density of neutrophils, NK cells, and B cells from the experiment presented in Figure 1E. (B) (Left) B16 tumor homogenate cytokines 7 days after intratumor mock (DMEM) or mRIPO treatment in KLH or polio immunized mice were measured and normalized to fold respective mean mock control values; asterisks indicate Tukey's post hoc test  $p < 0.05$  versus mock controls (n=5/group KLH immunized; n=8/group polio immunized). (Right) TDLN cells from KLH or polio immunized B16 tumor bearing mice 7 days after treatment with DMEM or mRIPO were cultured in RPMI 1640+10% FBS for 24 hours and cytokine release was measured (n=2 KLH-DMEM, n=4 for all others); asterisks indicate Kruskal-Wallis post-hoc test  $p < 0.05$ . (C) Experimental schema and analyses of infiltrating immune cells in the E0771 model, as done in Figure 1E for the B16 model. (D) PD1 and TIM3 surface staining on CD4+ and CD8+ T cells from tumor (TILs) or tumor draining lymph node (TDLN) derived single cell suspensions using the same samples analyzed in Figure 1G-F at day 12 post treatment, values were normalized to log(fold mean KLH-DMEM control). (E, F) Analysis of TIL phenotypes in the E0771 model for experiment presented in (C), as done for the B16 model in Fig 1G-F. (A, C, D, F) Data bars represent mean + SEM; (E) values were normalized as fold mean KLH-DMEM for each marker; (C-F) asterisks denote Dunnett's multiple comparison test vs corresponding DMEM treated controls ( $p < 0.05$ , two tailed); # indicates significant Tukey's post-hoc test vs all other groups.

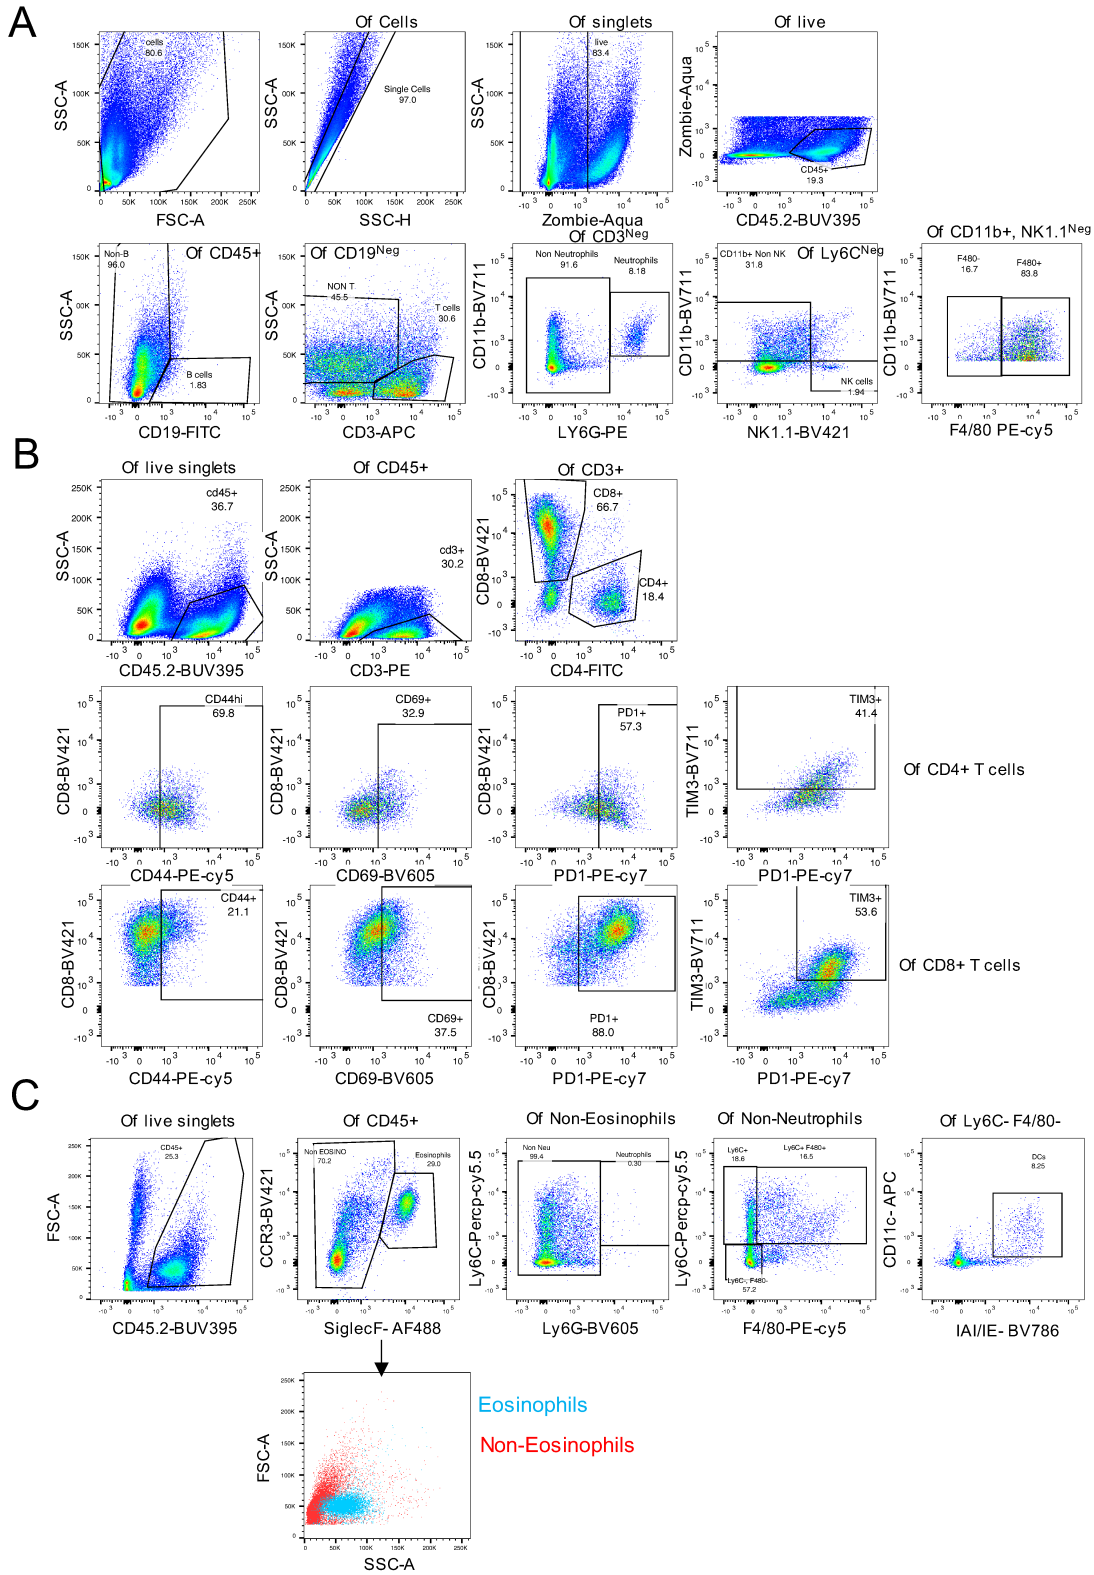

**Supplementary Figure 3.** Representative gating strategy for tumor infiltrating cells analyzed in Figures 1E-F and S2. Live singlets were selected after gating of cells, followed by single cells via forward scatter (FSC-A) vs height (FSC-H) comparison, and live/dead using Zombie-Aqua as shown. **(A)** Myeloid cell panel used to gate for B cells, T cells, myeloid cells, and NK cells as shown. **(B)** T cell panel used to gate for CD4<sup>+</sup> and CD8<sup>+</sup> T cells as well as gating for the indicated antigens on each. **(C)** Eosinophil and myeloid panel to determine the identity of CD11b<sup>+</sup> F4/80<sup>+</sup> cells identified in Figure 1E: CCR3 and Siglec F were used to gate for eosinophils relative to other myeloid populations and DCs. Confirmation of eosinophil identity was corroborated via confirming their granulocyte identity via SSC-A, and confirming they were Ly6C<sup>low/neg</sup>.

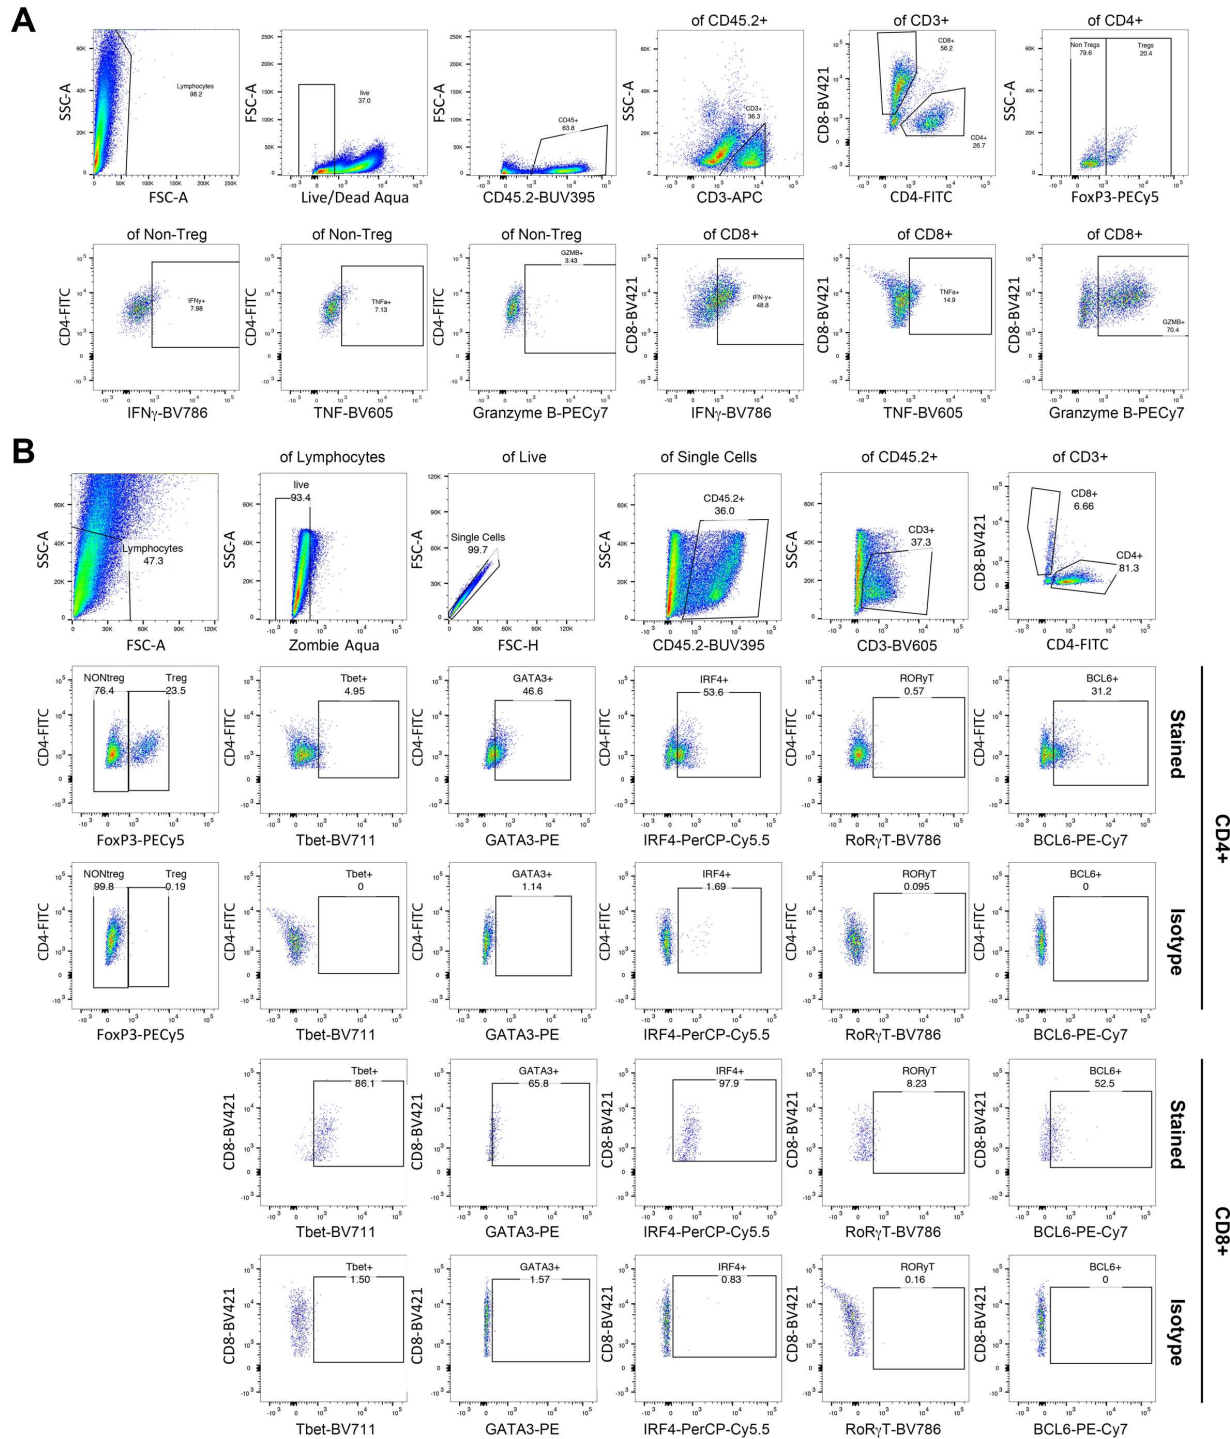

**Supplementary Figure 4.** Representative gating strategy for TIL activation/differentiation status as shown in Figures 1H and S2. Live/dead and singlet discrimination was performed as described in Figure S3. **(A)** T cell panel to determine conventional CD4<sup>+</sup> T cell, Treg, and CD8<sup>+</sup> densities as well as expression of the indicated intracellular cytokines and granzyme B as shown in Figure 1E and G. **(B)** T cell panel to measure T cell associated transcription factors as shown in Figure 1H; isotype controls for transcription factors were used as shown to guide gating.



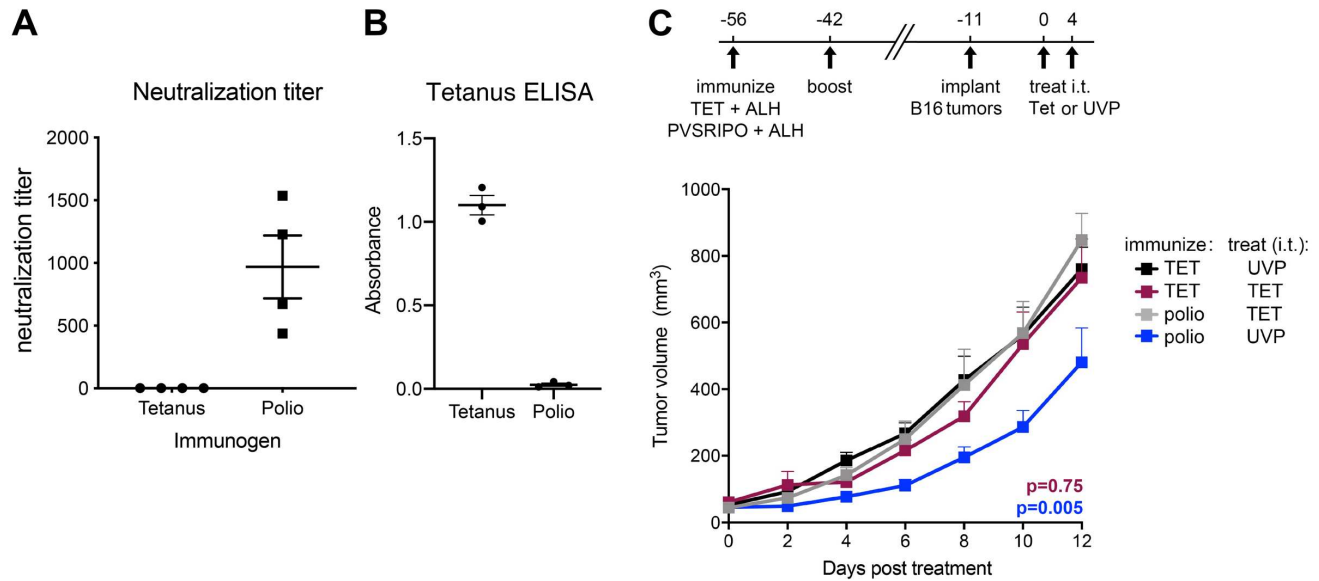

**Supplementary Figure 5.** (A, B) Validation of immunogen-specific serum antibodies for immunization strategies in Figure 2A and B by PVSRIPO plaque neutralization assay (A; n= 4/group) and tetanus ELISA (B; n= 3/group); mean  $\pm$  SEM is shown. (C) Repeat tumor therapy experiment for Figure 2A. Mean tumor volume + SEM are shown (Polio-Tet and Tet-UVP: n= 7; Tet-Tet: n= 6; Polio-UVP: n= 8).

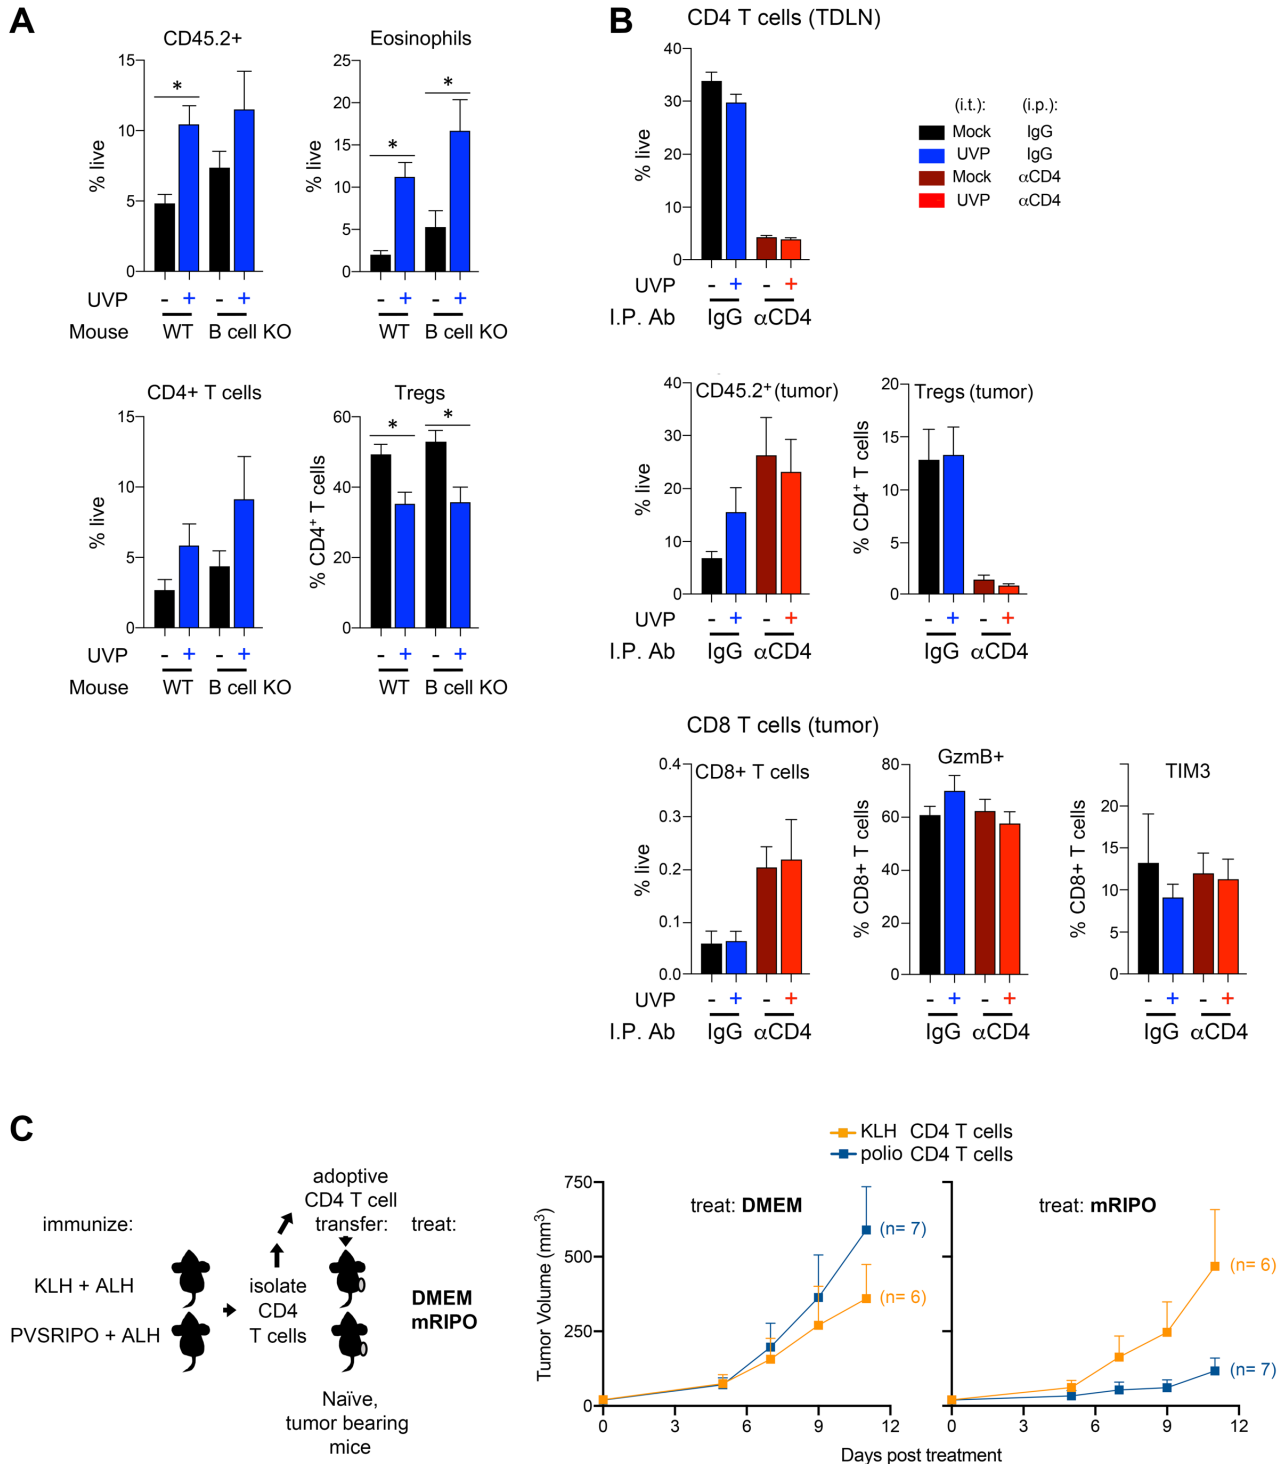

**Supplementary Figure 6.** Extended analyses from experiments in Figure 3. **(A)** Flow cytometry analysis of tumors 12 days after mock or UVP from wt or B cell k/o mice immunized and treated as in Figure 3A; mean + SEM is shown; (\*) Tukey's post hoc test  $p < 0.05$ . **(B)** Extended flow cytometry analysis of tumors and TDLN from Figure 3D; mean + SEM is shown. **(C)** Tumor volumes from repeat experiment of the assay described in Figure 3E, using CD4<sup>+</sup> T cells from KLH or polio immunized mice. Mean tumor volume + SEM are shown.

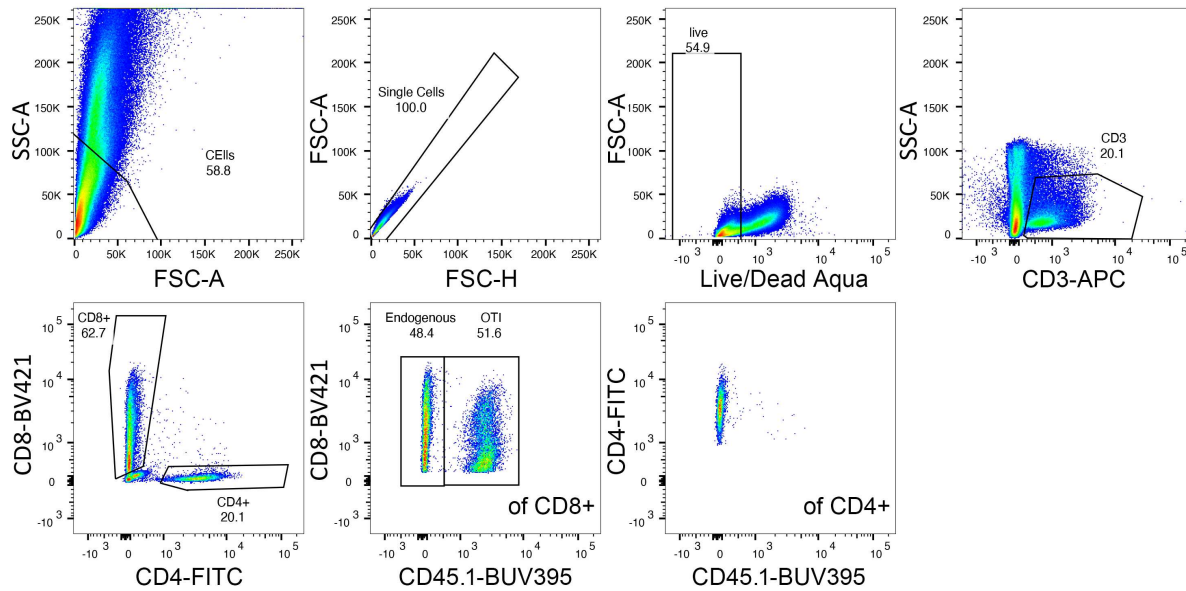

**Supplementary Figure 7.** Gating strategy for OT-I (CD45.1<sup>+</sup>) vs endogenous (CD45.1<sup>Neg</sup>) CD8<sup>+</sup> T cells in tumors from experiments presented in Figures 4 and S10; gating for markers of activation and differentiation were conducted as shown in Figure S4.

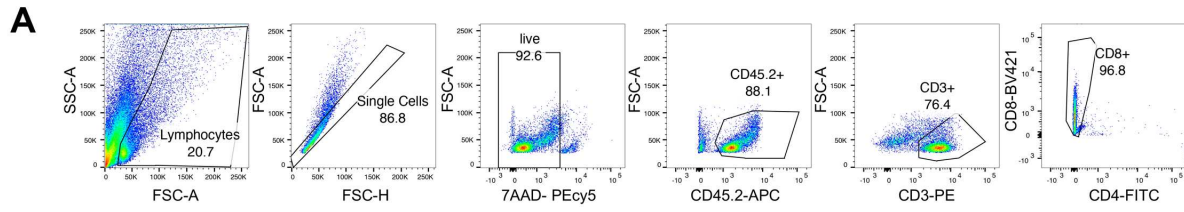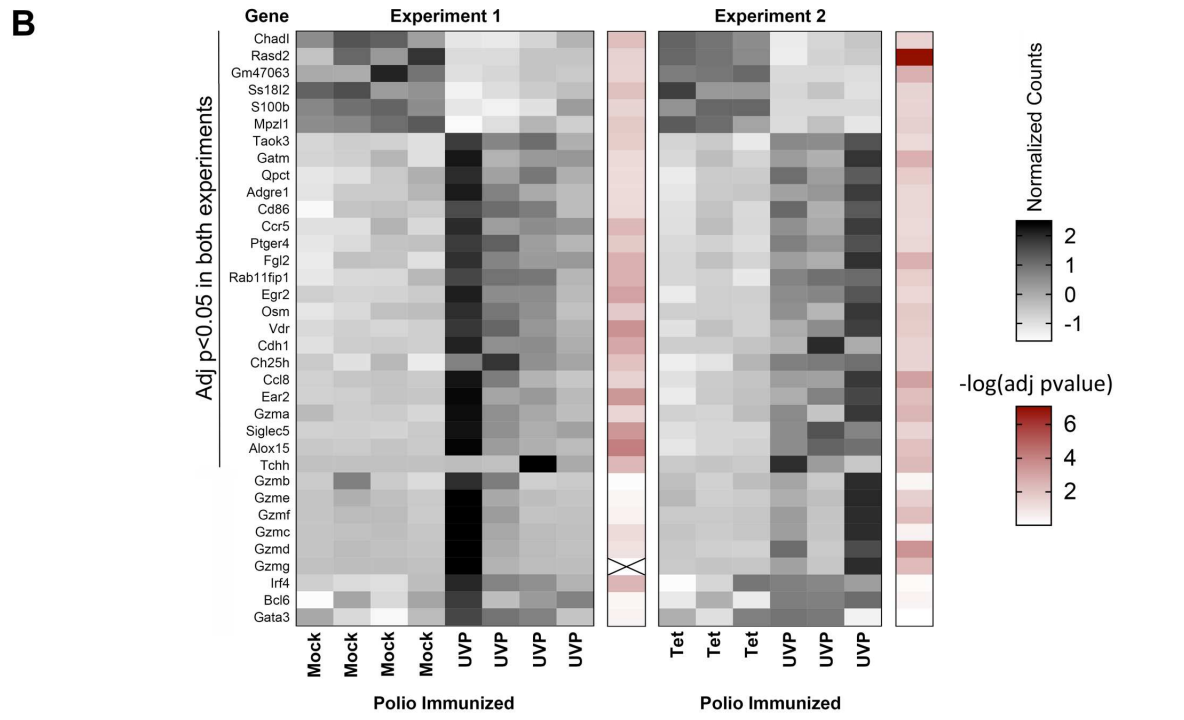

**C**

| Gene name(s)   | After UVP | Full name                                             | Relevance                                                                                  | Ref                                 |
|----------------|-----------|-------------------------------------------------------|--------------------------------------------------------------------------------------------|-------------------------------------|
| Chadl          | Down      | Chondroadherin like                                   | Collagen binding                                                                           | Uniprot                             |
| S100b          | Down      | S100 calcium binding protein B                        | expressed in subsets of CTLs, RAGE and NFkB signaling                                      | PMIDs: 19121341, 11705636, 21447379 |
| Gm47063        | Down      | predicted gene, 47063                                 | Unknown                                                                                    | Uniprot                             |
| Rasd2, Viperin | Down      | Radical S-Adenyosyl Methionine Domain Containing 2    | IFN inducible; Th2 polarization, TCR activation of NFkB and AP-1                           | PMID: 19047684                      |
| Ss18l2         | Down      | SS18-like protein 2                                   | Unknown                                                                                    | Uniprot                             |
| Mpz11          | Down      | Myelin Protein Zero Like 1                            | SRC/SHP2 signaling; SHP2 signaling may suppress antitumor T cell function                  | PMIDs: 24296779, 33446805, 19290938 |
| Taok3          | Up        | TAO kinase 3                                          | T cell activation, prevents SHP1 mediated inactivation                                     | PMID: 30373850                      |
| Rab11fip1      | Up        | RAB11 Family Interacting Protein 1                    | endosomal recycling, intracellular transport; associated with immune cell influx in cancer | Uniprot; PMID 34764984              |
| Ptger4         | Up        | Prostaglandin E receptor 4                            | promotes Th1 differentiation; upregulated on Th17 T cells                                  | PMIDs: 23575689, 29935220           |
| CD86, B7       | Up        | CD86 molecule                                         | expressed on APCs; Expressed by effector memory T cells                                    | Uniprot; PMID: 9973476              |
| Ccr5           | Up        | CC motif chemokine receptor 5                         | chemokine receptor; expressed by activated T cells                                         | PMID: 18632580                      |
| Ch25h          | Up        | cholesterol 25-hydroxylase                            | produces 25HC; inflammation during viral infection; constrains T cell inflammation in skin | PMIDs: 24994901, 34623903           |
| Osm            | Up        | ostonatin M                                           | IL6 family, released by T cells, promotes activation of SOCS3, STAT3, STAT5                | PMIDs: 17372020, 28093521           |
| Egr2           | Up        | Early growth response 2                               | Induce SOCS1/SOCS3 signaling; supports T cell proliferation and homeostasis                | PMIDs: 23021953, 25368162           |
| Adgre1; F4/80  | Up        | Adhesion G Protein-Coupled Receptor E1                | cell adhesion, expressed on antiviral CD8 T cells                                          | PMID: 14515257                      |
| Vdr            | Up        | Vitamin D Receptor                                    | T cell development, differentiation, and effector function                                 | PMID: 23785369                      |
| Cpct           | Up        | glutaminyl-peptide cyclotransferase                   | conversion of N-terminal glutamic acid into pyroglutamine                                  | PMID: 23183267                      |
| Fgl2           | Up        | Fibrinogen-like protein 2                             | Expressed by CTLs, type I immunity, IRF1 dependent                                         | PMIDs: 3550794, 14976252            |
| Gatm           | Up        | Glycine amidinotransferase                            | creatinine biosynthesis                                                                    | Uniprot                             |
| Ear2           | Up        | Eosinophil-associated, ribonuclease A family member 2 | eosinophils; cytotoxicity                                                                  | Uniprot                             |
| Alox15         | Up        | Arachidonate 15-Lipoxygenase                          | induced by Th2 responses; Fatty acid oxidation; Treg homeostasis                           | Uniprot, PMIDs: 31333453, 34040168  |
| Siglec5        | Up        | Sialic acid-binding Ig-like lectin 5                  | expressed by eosinophils, induced on activated CD8 T cells                                 | Uniprot, PMID: 17272508             |
| Ccl8; MCP2     | Up        | C-C motif chemokine ligand 8                          | Skin accumulation of Th2 cells                                                             | PMID: 21245898                      |
| Gzma           | Up        | Granzyme A                                            | Cytolysis                                                                                  | Uniprot                             |
| Cdhl           | Up        | cadherin 1                                            | adherence                                                                                  | Uniprot                             |
| Tchh           | Up        | trichohylin                                           | Unknown                                                                                    | Uniprot                             |
| Gzmb           | Up        | Granzyme B                                            | Cytolysis                                                                                  | Uniprot                             |
| Gzme           | Up        | Granzyme E                                            | Cytolysis                                                                                  | Uniprot                             |
| Gzmf           | Up        | Granzyme F                                            | Cytolysis                                                                                  | Uniprot                             |
| Gzmc           | Up        | Granzyme C                                            | Cytolysis                                                                                  | Uniprot                             |
| Gzmd           | Up        | Granzyme D                                            | Cytolysis                                                                                  | Uniprot                             |
| Gzmg           | Up        | Granzyme G                                            | Cytolysis                                                                                  | Uniprot                             |
| Irf4           | Up        | Interferon regulatory factor 4                        | CD8 T cell effector memory function                                                        | Uniprot; PMIDs: 33859042; 24835398  |
| Bcl6           | Up        | B-cell lymphoma 6                                     | Controls Granzyme expression in CD8 T cells                                                | Uniprot; PMID 17125145              |
| Gata3          | Up        | GATA Binding Protein 3                                | type 2 cytokines by CD8 T cells, CD8 T cell homeostasis                                    | Uniprot; PMID 23225883              |

**Supplementary Figure 8.** (A) Validation of CD45.1+ OT-I+ enrichment after positive CD45.1 selection using tumor suspensions in experiments in Fig 4C; note that OT-I T cells are positive for both CD45.2 and CD45.1, while endogenous T cells were only CD45.2+. (B) Normalized transcript counts (black) and  $-\log(\text{False Discovery Rate adjusted p-value})$  (red) for genes significantly different between OT-I T cells after polio recall (polio immunized mice treated with UVP) vs Mock or Tet treatment in polio immunized mice in two independent experiments as indicated by annotation in figure. In addition, relevant transcripts with protein changes in flow cytometry analyses (Fig 4C): granzymes, IRF4, BCL6, and GATA3 that approached significance in both studies were included; a p-value for *Gzmg* was not assigned in experiment 1 due to an outlier. (C) Table presents known relevance of genes from (B) to T cell biology (PMID= Pub Med ID) and directionality for change (consistent in both replicates) after treatment with UVP in polio immunized mice from two independent experiments.

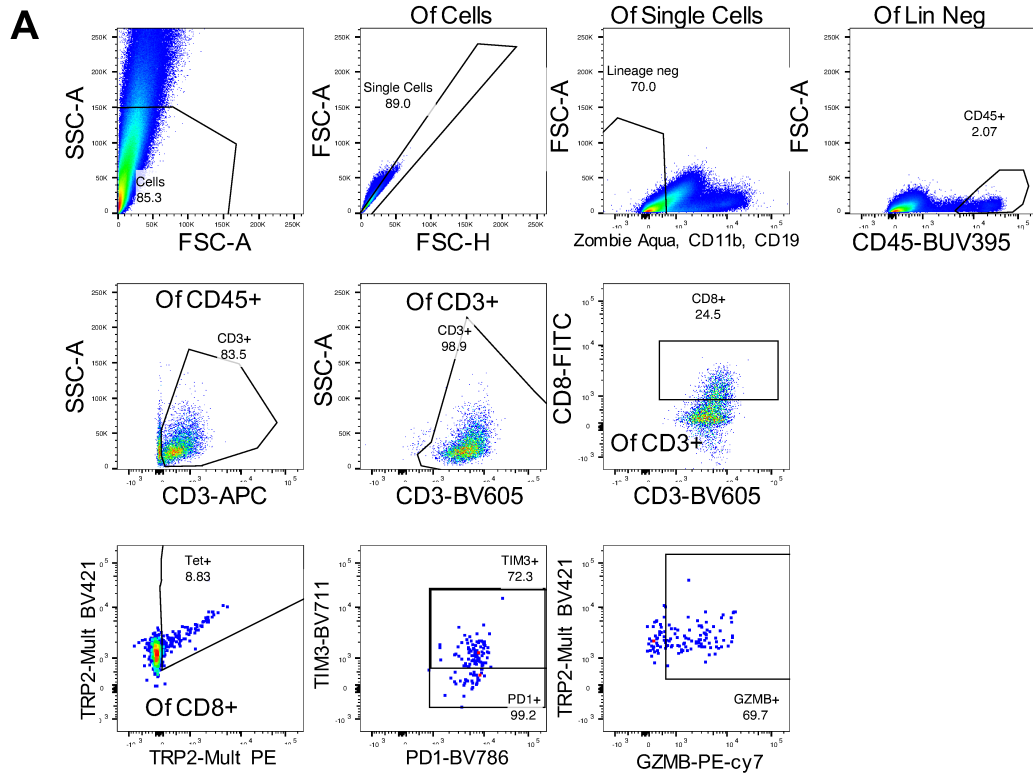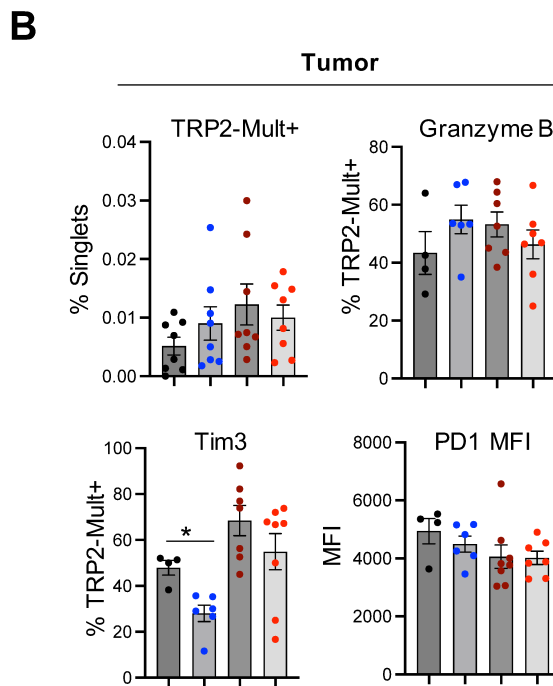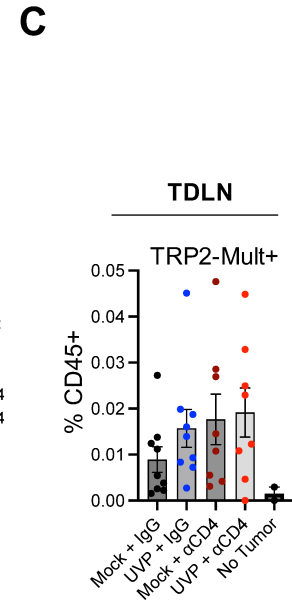

**Supplementary Figure 9.** TRP2-MHC class I multimer (TRP2-Mult)-specific T cells after polio recall with and without CD4<sup>+</sup> T cell depletion. **(A)** Gating strategy for TRP2-MHC-class I multimer (TRP2-Mult) specific TILs in B16 tumors. **(B, C)** Density and phenotype of TRP2-multimer specific CD8<sup>+</sup> TILs (B), or percentage of TRP2-multimer specific CD8<sup>+</sup> T cells out of CD45<sup>+</sup> cells from the TDLN (C). Lymph nodes from non-tumor bearing mice (“No Tumor”) were used to confirm specificity of multimer staining. Each data point indicates individual mice; bars and brackets indicate mean  $\pm$  SEM. For phenotypes of TRP2<sup>+</sup> T cells, samples with less than 20 TRP2-Multimer<sup>+</sup> events were excluded. Note that CD4<sup>+</sup> T cell depletion primarily depleted Tregs, which may explain increased levels of TRP2-multimer specific CD8<sup>+</sup> T cells in tumors and TDLNs after CD4 T cell depletion (Fig S6).



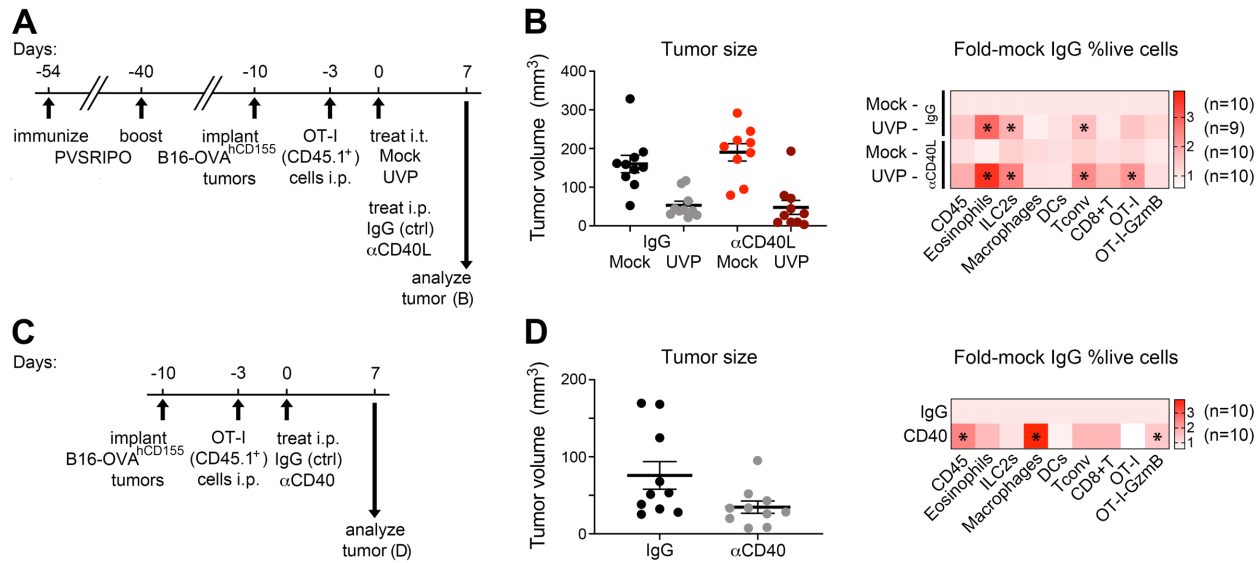

**Supplementary Figure 10. The antitumor efficacy of recall antigens is independent of CD40L-CD40 signaling.** (A) B16-OVA tumor bearing mice previously immunized against polio received adoptive transfer of OT-I T cells followed by intratumor treatment with either mock or UVP concomitant with control IgG or a CD40L blocking antibody (250 $\mu$ g, every 3 days) for experiment shown in (B). (B) Tumor volume (left) and analysis of tumor infiltrating immune cells (right) was conducted 7 days after treatment. Data bars depict mean  $\pm$  SEM; heatmap depicts fold-mock IgG control. (C) B16-OVA tumor bearing mice received adoptive transfer of OT-I cells followed by intraperitoneal treatment with control IgG or anti-CD40 antibody (50 $\mu$ g/mouse, once) for experiment shown in (D). (D) Tumor volume (left) and analysis of tumor infiltrating immune cells (right) were measured 7 days after treatment. Data bars depict mean  $\pm$  SEM; heatmap depicts fold-mock IgG control. Asterisks indicate Dunnett's post-hoc test relative to mock + IgG control (B), or unpaired t test relative to IgG control (D). All experiments were repeated at least twice and representative series are shown.

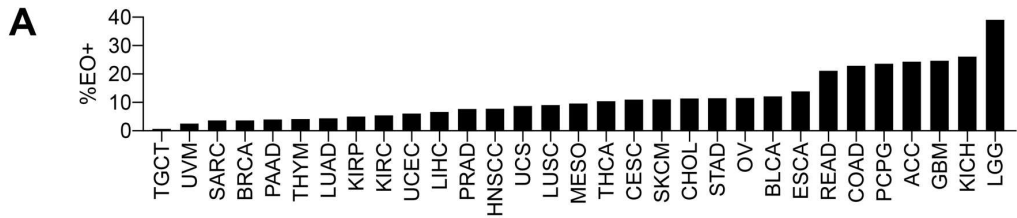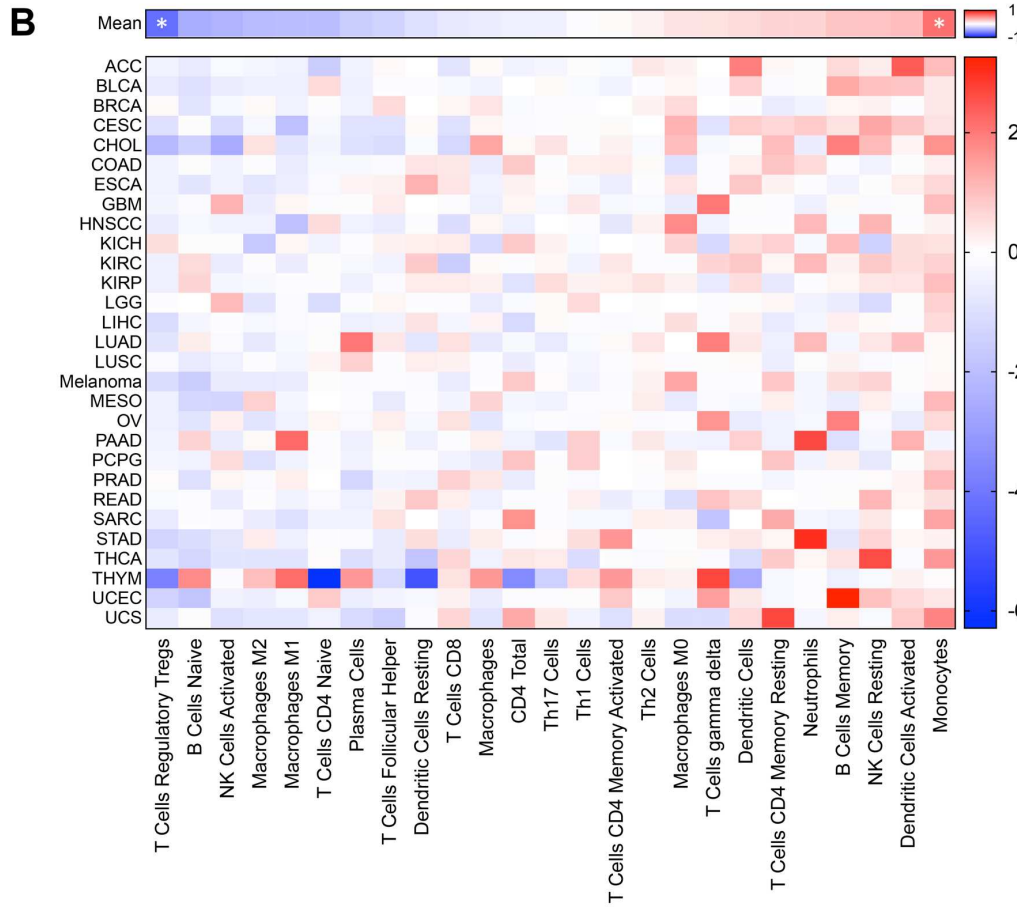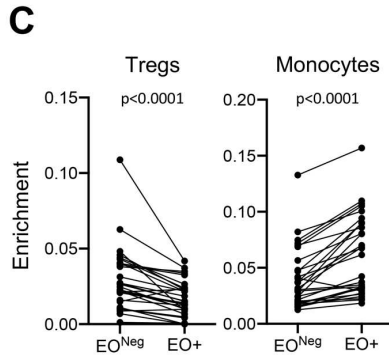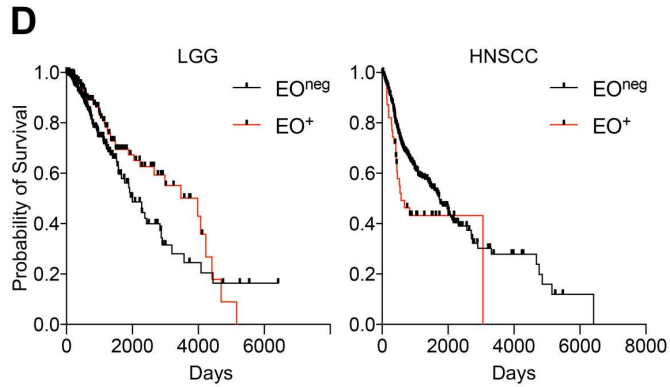

**Supplementary Figure 11.** Pan-cancer analysis of frequency of eosinophil detection by CIBERSORT within each cancer type (**A**); changes in the frequency of cell types associated with the presence vs absence of detected eosinophils (**B, C**); and survival of LGG and HNSCC by eosinophil detection vs absence corresponding to Figure 5A-B (**D**). (**B**) Asterisks denote significant False Discovery Rate adjusted paired t-test comparing cell type densities across cancer types (n=29); (**C**) p-values are from paired t-test for monocytes and Tregs across cancer types (n=29); (**B, C**) each cancer type was treated as one pair.

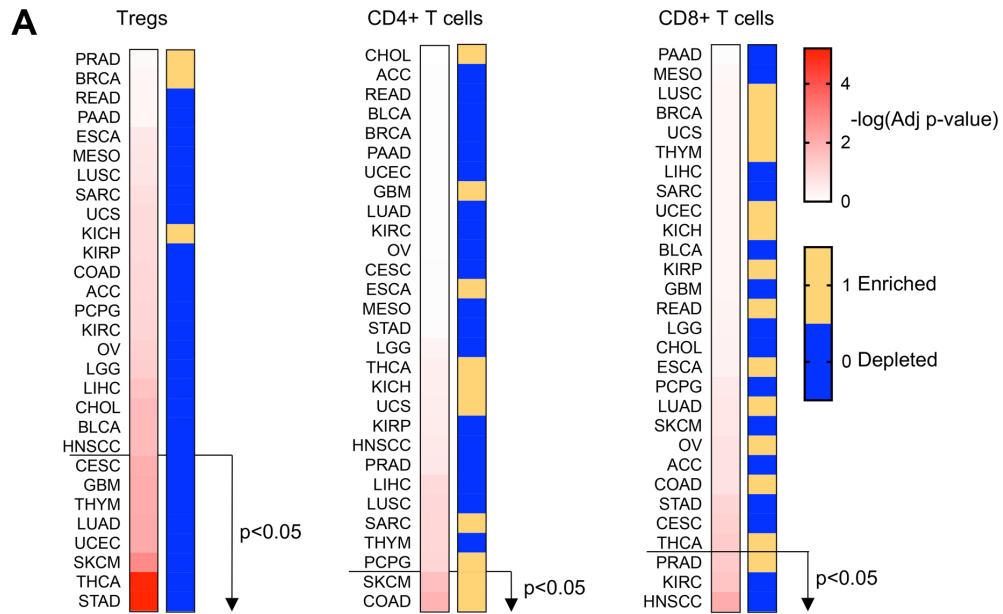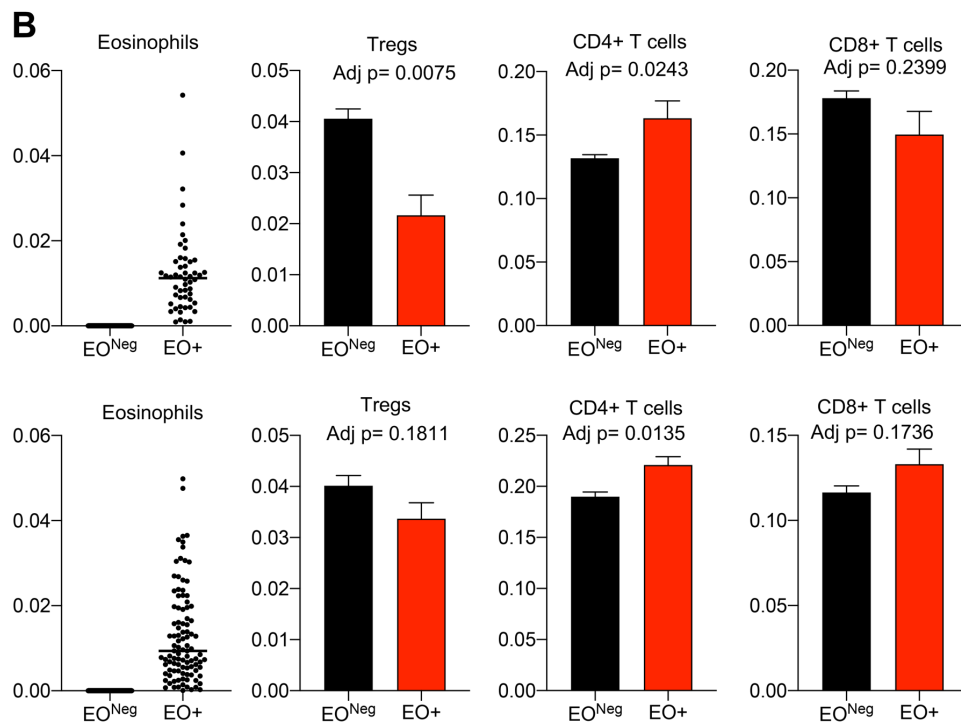

**Supplementary Figure 12.** (A) Pan-cancer analysis conducted in Fig 5A and Supplementary Figure 11, presenting False Discovery Rate corrected  $-\log(\text{p-value})$  and directionality (blue= depleted, yellow= enriched) within each cancer type for Tregs, CD4<sup>+</sup> T cells, and CD8<sup>+</sup> T cells; stratified by p-values (high to low) for difference in Tregs. (B) Eosinophil, Treg, CD4<sup>+</sup> T cell, and CD8<sup>+</sup> T cell predictions for melanoma (SKCM, top) and colorectal cancer (COAD, bottom) for cases with eosinophil detection (EO<sup>+</sup>) or no eosinophil detection (EO<sup>Neg</sup>). Adj p-values are from False Discovery Rate corrected paired t-test.

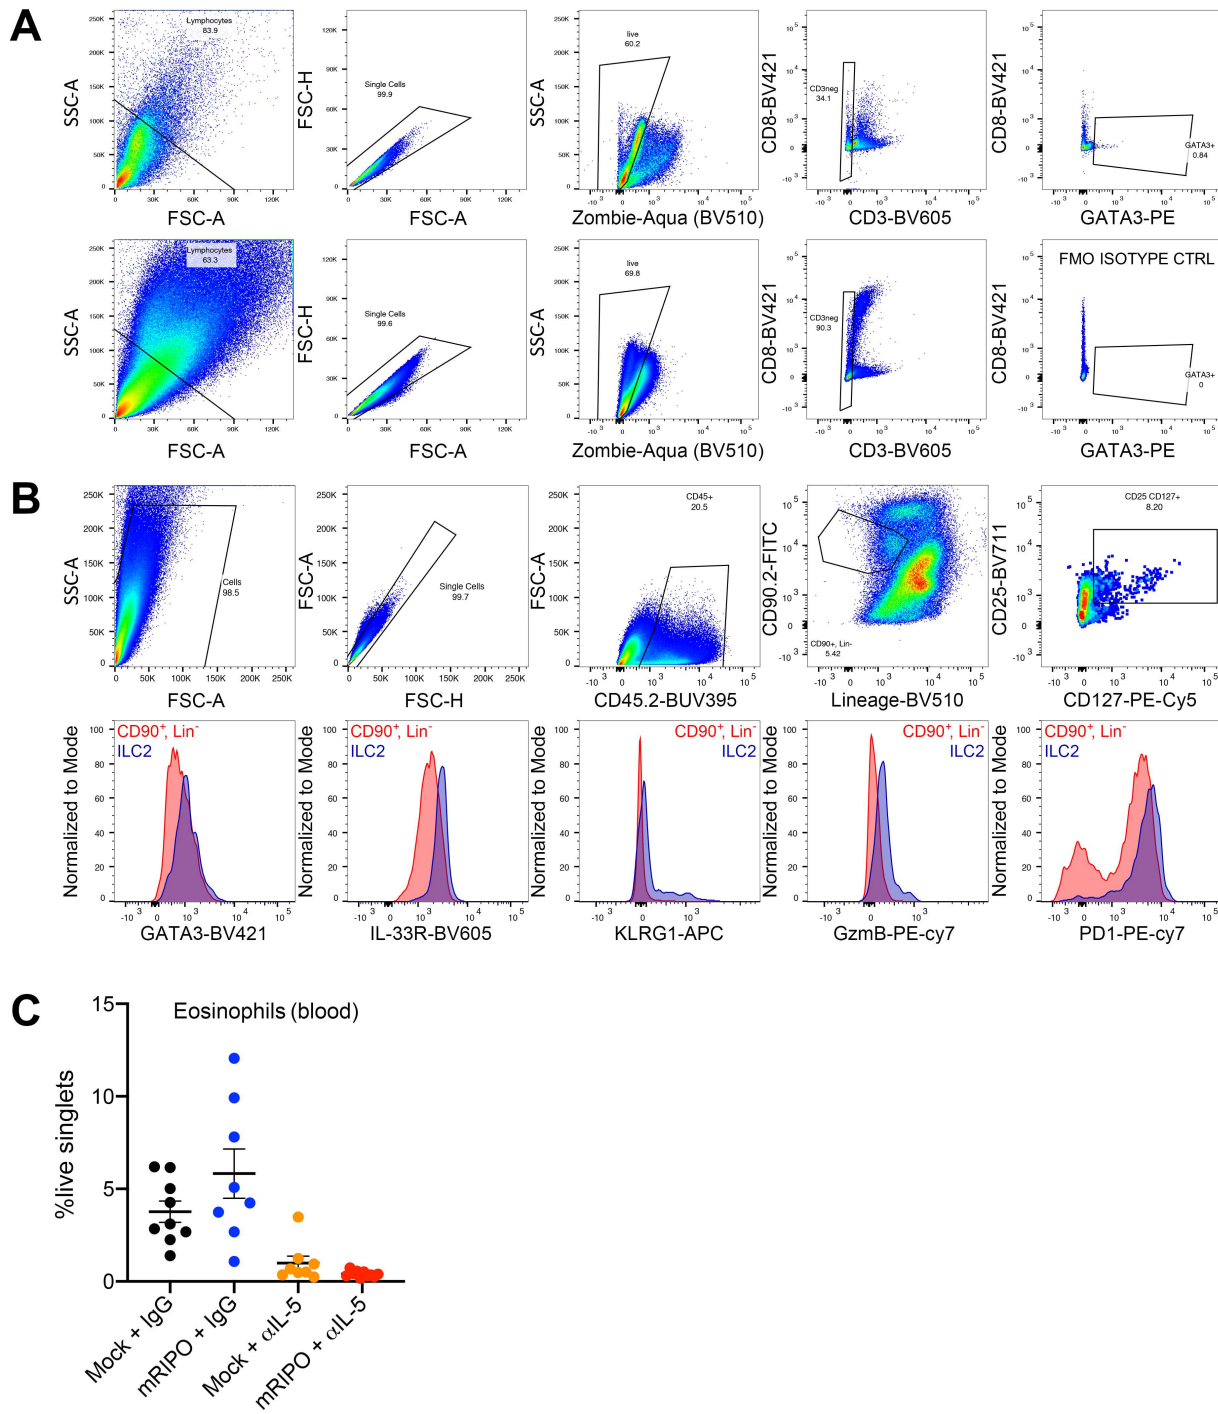

**Supplementary Figure 13.** (A) Gating strategy for %GATA3<sup>+</sup> CD3<sup>Neg</sup> cells presented in Figure 5C from prior experiments conducted in Figure 4. FMO= florescence minus one. (B) Gating strategy for ILC2s in Figures 5G and S10B, D (top), along with representative histograms showing ILC2 vs Lin<sup>-</sup>CD90.2<sup>+</sup> cells (bottom). Lineage= Zombie Aqua (live dead), CD3, CD5, CD19, NK1.1, CD11c, CD11b, FCεRIα, γδTCR, αβTCR. (C) Blood eosinophil levels determined for the experiment presented in Figure 5D-G.

**Supplementary Table 1.** Details of antibodies used in this study.

| Antigen        | Fluorophore | Vendor         | RRID/Identifier |
|----------------|-------------|----------------|-----------------|
| BCL6           | PEcy7       | Biolegend      | AB_2566196      |
| CCR3           | BV421       | Biolegend      | AB_2565743      |
| CD103          | PE          | Biolegend      | catalog# 156904 |
| CD11b          | BV711       | Biolegend      | AB_2563310      |
| CD11b          | BV510       | Biolegend      | AB_2629529      |
| CD11c          | APC         | Biolegend      | AB_313779       |
| CD11c          | BV605       | Biolegend      | AB_2562415      |
| CD11c          | BV510       | Biolegend      | AB_2562016      |
| CD127          | PEcy5       | Biolegend      | AB_1937261      |
| CD19           | FITC        | Biolegend      | AB_2629813      |
| CD19           | BUV395      | BD Biosciences | AB_2722495      |
| CD19           | BV510       | Biolegend      | AB_2562137      |
| CD25           | BV711       | Biolegend      | AB_2564130      |
| CD3            | APC         | Biolegend      | AB_2561456      |
| CD3            | FITC        | Biolegend      | AB_312661       |
| CD3            | BV510       | Biolegend      | AB_2562555      |
| CD3            | PE          | Biolegend      | AB_312663       |
| CD4            | FITC        | Biolegend      | AB_312713       |
| CD40           | BV605       | BD Biosciences | AB_2742809      |
| CD44           | PEcy5       | Biolegend      | AB_312961       |
| CD45.2         | BUV395      | BD Biosciences | AB_2738867      |
| CD45.2         | APCcy7      | Biolegend      | AB_830789       |
| CD5            | BV510       | Biolegend      | AB_2563930      |
| CD69           | BV605       | Biolegend      | AB_11203710     |
| CD8            | BV421       | Biolegend      | AB_11204079     |
| CD8            | FITC        | Thermo-Fisher  | AB_2538242      |
| CD86           | PEcy7       | Biolegend      | AB_493600       |
| CD90.2         | AF488       | Biolegend      | AB_492886       |
| F4/80          | PEcy5       | Biolegend      | AB_893482       |
| FCgR           | BV510       | Biolegend      | AB_2721324      |
| FoxP3          | PEcy5       | Thermo-Fisher  | AB_468806       |
| GATA3          | PE          | Biolegend      | AB_2562723      |
| Granzyme B     | PEcy7       | Biolegend      | AB_2728381      |
| IA/IE (MHC-II) | BV786       | Biolegend      | AB_2565977      |
| IFN-g          | BV786       | Biolegend      | AB_2629667      |
| IL33R/ST2      | BV605       | Biolegend      | AB_2860703      |
| IL5            | PE          | BD Biosciences | AB_395364       |
| IRF4           | PercpCy5.5  | Biolegend      | AB_2728482      |
| KLRG1          | APC         | Biolegend      | AB_10641560     |
| LY6C           | PercpCy5.5  | Biolegend      | AB_1659241      |
| LY6G           | PE          | Biolegend      | AB_1186099      |
| NK1.1          | BV421       | Biolegend      | AB_2562218      |
| NK1.1          | BV510       | Biolegend      | AB_2562217      |
| PD1            | PeCy7       | Thermo-Fisher  | AB_10853805     |
| PD1            | BV786       | Biolegend      | AB_2563680      |
| PDL1           | APC         | Biolegend      | AB_10612741     |
| RORgT          | BV786       | BD Biosciences | AB_2738916      |
| Siglec F       | AF488       | Biolegend      | catalog# 155524 |
| Tbet           | BV711       | Biolegend      | AB_2715766      |
| TCRb           | BV510       | Biolegend      | AB_2562350      |
| TCRg/d         | BV510       | Biolegend      | AB_2563534      |
| TIM3           | BV711       | Biolegend      | AB_2716208      |
| TNF            | BV605       | Biolegend      | AB_11123912     |
| TruStain FcX   | N/A         | Biolegend      | AB_1574975      |



**SUPPLEMENTARY METHODS:**

*Polio neutralizing antibody assay and ELISA.* Polio neutralization assays were performed as previously described<sup>9</sup>. ELISA to measure anti-polio antibodies was performed using Maxisorp plates (Nunc) coated with  $1 \times 10^7$  pfu PVSRIPO; blocked in PBS + 2% BSA + 0.05% Tween-20 (Sigma-Aldrich); incubated with serially diluted sera (1:20, 1:100, 1:500) for 2h; followed by incubation with 1:30,000 protein-A conjugated HRP (Thermo-Fisher) diluted in PBS for 1h; and development using TMB substrate (Thermo-Fisher) followed by blocking the reaction with H<sub>2</sub>SO<sub>4</sub> (Sigma-Aldrich). Absorbance (450nm) was measured using a Tecan Infinite pro plate reader. A similar procedure was used for detection of KLH antibodies and Tetanus-specific antibodies, coating plates at a concentration of 10 or 1 µg/ml antigen, respectively.

*Tumor homogenate TDLN culture cytokine measurements.* Freshly harvested B16 tumors were mechanically homogenized in 1ml PBS. Samples were frozen at -80°C, thawed, and centrifuged (4,000xG for 10min) to remove solid debris prior to cytokine analysis. Fresh TDLNs (inguinal lymph nodes) were collected in 1ml RPMI-1640 (Gibco), crushed over a 70-micron cell strainer (Olympus Plastics) using a 3ml syringe plunger (BD Biosciences), and resuspended in RPMI-1640 containing 10% FBS. Resulting cell suspensions were plated in a U-bottom 96 well cell culture plate (Greiner Bio-One) at a density of  $5 \times 10^6$  and cultured at 37°C for 24 hours. Cell suspensions were frozen until cytokine measurements were performed. Mouse Anti-Virus and Mouse Th Legendplex kits (Biolegend) were used to determine indicated analyte concentrations per manufacturer instructions, using the manufacturer's analysis software to determine concentration. Cytokines without measurable concentrations above the lower limit of detection for more than 50% of the samples tested were excluded. For samples below the threshold, the threshold value was used.

*Adoptive transfer studies and RNA sequencing of tumor infiltrating OT-I T cells.* For adoptive transfer of CD4<sup>+</sup> T cells from polio or Tet immunized mice, spleens (two each) were harvested. Separately, hCD155-tg C57BL/6 mice were implanted with B16.F10.9<sup>hCD155</sup> tumors six days prior to splenocyte isolation. Spleens from immunized mice were crushed through a 70 µm cell strainer in 3ml RPMI-1640. Resulting cell pellets were reconstituted in 2ml ACK red blood cell lysis buffer (Lonza) and incubated for 10 min at RT, followed by addition of 10ml RPMI and centrifugation.

CD4<sup>+</sup> T cells were negatively selected from single cell suspensions using the EasySep™ CD4<sup>+</sup> T cell isolation kit (Stemcell Technologies) following the manufacturer's instructions. Two million CD4<sup>+</sup> T cells were injected intraperitoneally six days after B16<sup>hCD155</sup> tumor implantation. Seven days after tumor implantation, recipient mice were treated with mock (DMEM) or mRIPO (1x10<sup>7</sup> pfu) and tumor growth was monitored. For adoptive transfer of OT-I x CD45.1 cells, spleens from OT-I x CD45.1 mice were harvested and processed to single cell suspensions as described above. OT-I splenocytes were treated with 10µg/ml SIINFEKL peptide (Invivogen) for 16 hours, washed in PBS, and then 2x10<sup>6</sup> OT-I splenocytes were transferred in 100µl i.p. For transfer of T cells from mice treated with recall antigen therapy, splenocytes were processed as described above and transferred to naïve recipients immediately following subcutaneous injection of B16.F10.9-OVA cells. For analysis of OT-I T cell transcriptomes after polio recall, mice immunized against polio (PVSRIPO, 1x10<sup>7</sup> pfu in Alhydrogel) 45 days (prime) and 30 days (boost) prior to B16-OVA tumor implantation received SIINFEKL-activated OT-I splenocytes as described above, and were treated with intratumor mock (PBS) or UVP 9 days after tumor implantation. Twelve days post-treatment tumors were dissociated and subjected to CD45.1 positive selection (MojoSort cell mouse CD45.1 selection kit, Biolegend) per the manufacturer's instructions. A subset of the isolated cells were used to confirm purity by flow cytometry for 7-AAD (Biolegend), CD45.2-BUV395, CD3-PE, CD8-BV421, CD4-FITC; the remaining cells were lysed in 200µl Trizol (Thermo-Fisher). Chloroform extracted RNA from Trizol samples (per manufacturer's instructions) was purified using the RNEasy kit (Qiagen, Inc.) and analyzed on a Hi-seq Illumini sequencer (150bp, PE) at Azenta Life Sciences. Transcripts were aligned with STAR (v2.7) to the GRCh38 mouse genome and differential expression analysis was performed using DESeq2 (v 1.34).

*Flow cytometry antibody panels.* The panels used in this study include the following antigen-specific antibodies or reagents (see Supplementary Table 1 for antibody sources): lineage panel 1: CD45.2-BUV395 and CD40-BV605, Zombie-Aqua Live/dead, NK1.1-BV421, CD11b-BV711, IA/IE-BV786, CD19-FITC, LY6G-PE, F4/80-PEcy5, CD86-PEcy7, CD3-APC; lineage panel 2: CD19-BUV395, 7-AAD, CD45.2-APC-Cy7, CD11b-BV711, LY6C-PerCP-Cy5.5, LY6G-PE, CD3-FITC, CD11c-APC; lineage panel 3: CD45.2-BUV395 and CD40-BV605, Zombie-Aqua Live/dead, NK1.1-BV421, CD11b-BV711, IA/IE-BV786, CD3/CD19-FITC, LY6G-PE, F4/80-

PEcy7, CD86-PEcy7, CD11c-APC; T cell panel: CD45.2-BUV395, Zombie-Aqua Live/dead, CD3-PE, CD4-FITC, CD8-BV421, CD69-BV605, PD1-PE-Cy7, TIM3-BV711, CD44-PE-Cy5; Intracellular staining T cell panel 1: CD45.2-BUV395, Zombie-Aqua Live/dead, CD3-APC, CD4-FITC, CD8-BV421, FoxP3-PE-Cy5, IFN- $\gamma$ -BV786, TNF-BV605, Granzyme B-PE-Cy7; intracellular staining T cell panel 2: CD45.2-BUV395, Zombie-Aqua Live/dead, CD3-APC, CD4-FITC, CD8-BV421, FoxP3-PE-Cy5, Tbet-BV711, GATA3-PE, IRF4-PerCP-Cy5.5, RoR $\gamma$ T-BV786, and BCL6-PE-Cy7; OT-I T cell panels were accomplished using the three above T cell panels with exchange of CD45.2 for CD45.1-BUV395; Eosinophil panel: CD45.2-BUV395, CCR3-BV421, Zombie Aqua, CD3/CD19/NK1.1-BV510, CD11c-BV605, CD11b-BV711, IA/IE-BV786, Siglec F-AF488, Ly6C-PERCP-Cy5.5, CD103-PE, F4/80-PECy5, PD1-PEcy7, PD-L1-APC; and ILC2 panel: CD45.2-BUV395, Zombie Aqua, CD3/CD5/CD19/NK1.1/CD11c/CD11b/FC $\epsilon$ RIa/ $\gamma$  $\delta$ TCR/ $\alpha$  $\beta$ TCR-BV510, ST-2(IL33R)-BV605, CD25-BV711, PD1-BV786, CD90.2-AF488, IL5-PE, CD127-PEcy5, Granzyme B-PECy7, KLRG1-APC.

*Analysis of TRP2-MHC-class I specific CD8 T cells in B16 tumors and TDLNs.* The day before harvest, Flex-T Biotin H2 K(b) TRP2 Monomers (SVYDFVWL; Biolegend) were multimerized and conjugated with PE or BV421 streptavidin (both Biolegend) according to the manufacturer's instructions. Polio immunized mice bearing B16 tumors treated with mock or UVP in the presence or absence of CD4 depleting antibody (see main text) as described in corresponding figure legends were euthanized; tumors and TDLN (inguinal lymph node) were harvested and dissociated as described in the Materials and Methods section of the main text. After dissociation, single cell suspensions were stained with Zombie Aqua, followed by incubation with the SRC inhibitor Dasatinib (Tocris) in FACs buffer (10% FBS + PBS) at a concentration of 100nM for 30 minutes to prevent TCR internalization during multimer staining. Following incubation, samples were stained for 30min at 4°C using 2 $\mu$ l per sample of the prepared BV421 and PE bound TRP2-MHCclass I multimers. Surface staining antibodies were then used for staining (see Supplementary Table 1 for antibody information): CD45.2-BUV395, CD19-BV510, CD11b-BV510, CD3-BV605, TIM3-BV711, PD1-BV786, CD8a-FITC, and CD3-APC. Samples were incubated for 30 minutes at 4°C followed by washing in FACs buffer. Samples were then fixed and permeabilized using the FoxP3/Transcription Factor Staining Buffer Set (Thermo-Fisher), following manufacturer instructions, and stained with Granzyme B-PEcy7 overnight. Cells were washed and

analyzed. Inguinal lymph nodes from non-tumor bearing mice were used to determine TRP2-MHC class I multimer bound CD8<sup>+</sup> T cells.

*Associations of eosinophils with other cell types in human tumors and survival.* CIBERSORT predicted cell type enrichment for each cancer type were obtained from Thorsson et al<sup>37</sup>. Within each cancer type, cases were sorted by eosinophil enrichment, and comparisons were performed between cases with eosinophil score = 0 (EO<sup>Neg</sup>) vs eosinophil score >0 (EO+). Total CD4<sup>+</sup> T cells reflects the sum of the following scores: 'T cells CD4 Memory Activated' + 'T cells CD4 Memory Resting' + 'T cells CD4 Naïve' + 'T cells follicular helper.' For pan-cancer analyses mean enrichment values for each cell type were determined for EO<sup>Neg</sup> and EO+ for comparison. Mean values from each cell type were scaled and centered within each cell type score across all samples (both EO<sup>Neg</sup> and EO+), followed by subtracting normalized EO+ from EO<sup>Neg</sup> values to generate heatmaps in Fig S9B and Fig S10A. False discovery rate (Benjamini-Hochberg method) was used to adjust for multiple comparisons in Figs S9B and S10A. Hazard ratios and 95% confidence intervals of survival of patients in EO+ vs EO<sup>Neg</sup> cohorts were determined using the Mantel-Haenszel test and statistical significance was determined using a Mantel-Cox log rank test.
